# Supplementary material for: The PPARδ Agonist GW501516 Improves Lipolytic/Lipogenic Balance through CPT1 and PEPCK during the Development of Pre-Implantation Bovine Embryos
Source: PubMed Central journal article supplement (PMC6928732; doi:10.3390/ijms20236066), 2019-12-02
Supplement: ijms-20-06066-s001.pdf [file ijms-20-06066-s001.pdf]

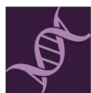

**Table S1.** Primers, their accession number, sequence and size used for qRT-PCR.

| Gene Name                      |   | Sequence               | Product Size | Accession No   |
|--------------------------------|---|------------------------|--------------|----------------|
| <i>PCK1</i>                    | F | CTTGGAAGAAGTGCTTTGC    | 226          | NM_174737.2    |
|                                | R | TCATCCAGGCGATATCATCA   |              |                |
| <i>ATGL</i>                    | F | CTGCTGACCACACTCTCCAA   | 192          | FJ798978.1     |
|                                | R | GGCGGTATCATCAGGTA      |              |                |
| <i>SLC2A1</i>                  | F | CCCCAGAAGGTGATTGAAGA   | 168          | NM_174602.2    |
|                                | R | GCCGAAACGGTTAACAAAAA   |              |                |
| <i>PLIN2</i>                   | F | ACTGGCTGGTAGGTCCTTT    | 196          | NM_173980.2    |
|                                | R | CTGCCTGCCTACTTCAGACC   |              |                |
| <i>PPAR<math>\alpha</math></i> | F | AGCCATATTTGCGATGCTGTCT | 322          | XM_024991367.1 |
|                                | R | AGAGGAAGACGTCGTCAGGATG |              |                |
| <i>PPAR<math>\gamma</math></i> | F | TAAAGCGTCAGGGTTCCACTAT | 333          | NM_181024.2    |
|                                | R | CGGGAAGGACTTTATGTACGAG |              |                |
| <i>PPAR<math>\delta</math></i> | F | GACCAGAGCACTCACTTCCTTC | 315          | XM_024983411.1 |
|                                | R | TCTTCAGGTAGGCGCTGTAGAT |              |                |
| <i>LMF 1</i>                   | F | AACCCTGTGGCCTACTTCT    | 164          | NM_001075190.2 |
|                                | R | ATGAGGACCACCTGGAACAG   |              |                |
| <i>LMF 2</i>                   | F | GCCCTCACCTACCACTACGA   | 190          | NM_001037455.1 |
|                                | R | GCAGCAAGACCTGGGAGTAG   |              |                |
| <i>LPL</i>                     | F | ACTTTGTACAGGCACAACCG   | 130          | NM_001075120.1 |
|                                | R | ACGATTATTGCTCAGCATGG   |              |                |

**Table S2.** Cleavage and development percentages of bovine embryos, Control, 2-BP and GW501516.

| Groups   | No. of Fertilized Zygotes | No. of Cleavage Embryo (% $\pm$ SEM) | No. of Blastocysts (% $\pm$ SEM)  | No. of Hatched Blastocysts (% $\pm$ SEM) |
|----------|---------------------------|--------------------------------------|-----------------------------------|------------------------------------------|
| Ctrl     | 372                       | 280 (75.1 $\pm$ 3.5) <sup>ab</sup>   | 119 (32.4 $\pm$ 1.9) <sup>a</sup> | 27 (24.1 $\pm$ 1.7) <sup>a</sup>         |
| 2-BP     | 372                       | 260 (69.5 $\pm$ 3.2) <sup>a</sup>    | 89 (23.6 $\pm$ 0.9) <sup>a</sup>  | 20 (21.5 $\pm$ 4.1) <sup>a</sup>         |
| GW501516 | 361                       | 298 (82.6 $\pm$ 1.1) <sup>b</sup>    | 141 (39.4 $\pm$ 2.8) <sup>b</sup> | 42 (47.3 $\pm$ 4.2) <sup>b</sup>         |

<sup>a,b</sup> Values with different superscripts in the same column are significantly different ( $p < 0.05$ ). This experiment was completed in eight replicates.
